# Supplementary material for: Associations of Diabetes and Hyperglycaemia with Extent and Outcomes of Acute Burn Injuries
Source: MDPI journal article supplement (doi:10.3390/biomedicines12051127), 2024-05-19
Supplement: s1 [file s1]

## Supplementary Material

“Associations of diabetes and hyperglycaemia with extent and outcomes of acute burn injuries” by

Jeffrey Chandra, Edward Raby, Fiona M. Wood, P. Gerry Fegan & Bu B. Yeap

### Results

#### Baseline diabetes therapy

3 patients had Type 1 diabetes: 2 receiving a basal-bolus regimen, the other using an insulin pump. In 26 patients diagnosed with Type 2 diabetes, 8 were on monotherapy, 10 dual therapy, 5 triple and 1 quadruple therapy; these included 11 patients receiving insulin. Two were diet-controlled.

#### Initiation of insulin therapy

Two patients with known diabetes who were insulin naive required insulin treatment, being given on average 4 and 11 IU/day. Five patients with no history of diabetes who had BSL monitoring received insulin during their stay, being given 14, 15, 16, 35 and 122 IU/day.

#### Treatment of patients with known diabetes

Six patients with a history of diabetes did not experience any hyperglycaemia. Their existing diabetes treatment regimens included 3 on metformin monotherapy, and one each on metformin and one or two additional oral agents or insulin. In the 24 patients with a history of diabetes who did experience hyperglycaemia, 18 were admitted on oral hypoglycaemic agents. Of these, 9 patients had insulin included in their regimen, 4 patients had metformin monotherapy, 3 received metformin and an additional agent while 2 received metformin with 2 additional agents.

**Table S1.** Patients were categorised according to diabetes status based on history of diabetes and admission HbA1c, and whether they had inpatient BSL monitoring. Data are shown as median (25<sup>th</sup> and 75<sup>th</sup> percentiles), mean (SD) or percentage (N).

|                                  | <b>Undiagnosed diabetes (no history of diabetes, admission HbA1c <math>\geq 6.5\%</math>)</b> |                 | <b>Pre-existing diabetes (history of diabetes OR admission HbA1c <math>\geq 6.5\%</math>)</b> |                 | <b>No diabetes (no history of diabetes and admission HbA1c <math>&lt; 6.5\%</math>)</b> |                    |
|----------------------------------|-----------------------------------------------------------------------------------------------|-----------------|-----------------------------------------------------------------------------------------------|-----------------|-----------------------------------------------------------------------------------------|--------------------|
| Inpatient BSL monitoring         | <b>Yes</b>                                                                                    | <b>No</b>       | <b>Yes</b>                                                                                    | <b>No</b>       | <b>Yes</b>                                                                              | <b>No</b>          |
| N                                | 3<br>(M=3, F=0)                                                                               | 1<br>(M=1, F=0) | 32<br>(M=24, F=8)                                                                             | 2<br>(M=2, F=0) | 18<br>(M=12, F=6)                                                                       | 99<br>(M=69, F=30) |
| Age (years)                      | 51                                                                                            | 39              | 55                                                                                            | 53              | 52                                                                                      | 43                 |
| TBSA (%)                         | 8.0 (5.3, 8.8)                                                                                | 4.0             | 1.0 (0.5, 3.0)                                                                                | 4.0 (4.0, 4.0)  | 18 (12, 27)                                                                             | 2.5 (1.0, 4.0)     |
| % patients on NGT nutrition      | 33% (1)                                                                                       | 0               | 6.3% (2)                                                                                      | 0               | 61% (11)                                                                                | 0                  |
| LOS (days)                       | 10 (8.0, 11)                                                                                  | 5               | 6 (4.0, 10)                                                                                   | 5 (5.0, 5.0)    | 19 (15, 40)                                                                             | 5 (3.0, 8.0)       |
| Admission HbA1c (%)              | 7.7 (7.2, 10)                                                                                 | 7.1             | 8.4 (7.1, 9.6)                                                                                | 6.1 (5.6, 6.6)  | 5.4 (5.3, 5.8)                                                                          | 5.2 (5.0, 5.6)     |
| BSL measurements                 | 105                                                                                           | 0               | 784                                                                                           | 0               | 434                                                                                     | 0                  |
| Mean BSL (mmol/L)                | 13 (5.5)                                                                                      | N/A             | 10 (4.1)                                                                                      | N/A             | 8.7 (2.9)                                                                               | N/A                |
| BSL $\geq 11.1$ mmol/L           | 59% (62)                                                                                      | 0               | 31% (246)                                                                                     | 0               | 14% (59)                                                                                | 0                  |
| BSL $\geq 16$ mmol/L             | 24% (25)                                                                                      | 0               | 8.7% (68)                                                                                     | 0               | 3.0% (13)                                                                               | 0                  |
| BSL $\leq 4$ mmol/L              | 1.0% (1)                                                                                      | 0               | 2.3% (18)                                                                                     | 0               | 0                                                                                       | 0                  |
| Median days with BSL monitoring  | 10 (4,11)                                                                                     | 0               | 6 (3.8, 10)                                                                                   | 0               | 8 (2.8,13)                                                                              | 0                  |
| Days with BSL measurement        | 25                                                                                            | 0               | 226                                                                                           | 0               | 138                                                                                     | 0                  |
| Days with BSL $\geq 11.1$ mmol/L | 80% (20)                                                                                      | 0               | 52% (117)                                                                                     | 0               | 20% (27)                                                                                | 0                  |

**Table S2.** Patients with known diabetes or undiagnosed diabetes (admission HbA1c  $\geq 6.5\%$ ) (A) and without a history of diabetes with an admission HbA1c  $< 6.5\%$  (B) who received inpatient BSL monitoring, stratified according to %TBSA. Data are shown as percentage (%) and number (n) of BSL events, and days with BSL  $\geq 11.1$  mmol/L.

**A**

| TBSA         | N         | Total BSLs | % of BSL events (N) |                  |                  | Total days with BSLs | Days with BSL $\geq 11.1$ mmol/L |
|--------------|-----------|------------|---------------------|------------------|------------------|----------------------|----------------------------------|
|              |           |            | $\geq 11.1$ mmol/L  | $\geq 16$ mmol/L | $\leq 4$ mmol/L  |                      |                                  |
| <1%          | 14        | 307        | 30% (92)            | 6.5% (20)        | 1.6 (5)          | 85                   | 51% (43)                         |
| 1 to <2%     | 5         | 150        | 27% (40)            | 8.7% (13)        | 0% (0)           | 47                   | 43% (20)                         |
| 2 to <5%     | 5         | 94         | 18% (17)            | 5.3% (5)         | 1.1% (1)         | 30                   | 40% (12)                         |
| 5 to 10%     | 4         | 179        | 45% (80)            | 15% (26)         | 6% (11)          | 45                   | 73% (33)                         |
| $\geq 10\%$  | 3         | 46         | 28% (13)            | 8.7% (4)         | 2.3% (1)         | 16                   | 44% (7)                          |
| Unknown      | 1         | 8          | 50% (4)             | 0                | 0                | 3                    | 25% (2)                          |
| <b>Total</b> | <b>32</b> | <b>784</b> | <b>31% (246)</b>    | <b>8.7% (68)</b> | <b>2.3% (18)</b> | <b>226</b>           | <b>52% (117)</b>                 |

**B**

|              |           |            |                 |                  |               |            |                 |
|--------------|-----------|------------|-----------------|------------------|---------------|------------|-----------------|
| <1%          | 0         | 0          | 0% (0)          | 0% (0)           | 0% (0)        | 0          | 0% (0)          |
| 1 to <2%     | 0         | 0          | 0% (0)          | 0% (0)           | 0% (0)        | 0          | 0% (0)          |
| 2 to <5%     | 2         | 19         | 16% (3)         | 0% (0)           | 0% (0)        | 6          | 33% (2)         |
| 5 to <10%    | 2         | 12         | 0% (0)          | 0% (0)           | 0% (0)        | 5          | 0% (0)          |
| $\geq 10\%$  | 14        | 403        | 14% (56)        | 3.2% (13)        | 0% (0)        | 127        | 20% (25)        |
| Unknown      | 0         | 0          | 0% (0)          | 0% (0)           | 0% (0)        | 0          | 0% (0)          |
| <b>Total</b> | <b>18</b> | <b>434</b> | <b>14% (59)</b> | <b>3.0% (13)</b> | <b>0% (0)</b> | <b>138</b> | <b>20% (27)</b> |

**Table S3.** Associations of variables with risk of length of stay (LOS) during hospitalization for acute burn injury, in patients with HbA1c (N=149). Data are shown as regression coefficients for change in outcome counts using Negative Binomial regression, with 95% confidence intervals, and p-values for individual factors.

| <b>Variables*</b>                         | <b>Negative Binomial <sup>a</sup></b> |
|-------------------------------------------|---------------------------------------|
| <b>Intercept</b>                          | 4.09 (3.09, 5.40)                     |
| <b>Diabetes/monitoring status</b>         |                                       |
| No history of diabetes, BSL not monitored | Reference                             |
| No history of diabetes, BSL monitored     | 1.55 (1.08, 2.23), p = 0.027          |
| Known diabetes, BSL monitored             |                                       |
| <b>Inpatient hyperglycaemia</b>           |                                       |
| Inpatient hyperglycaemia                  | 1.28 (1.01, 1.63), p = 0.037          |
| <b>Nutrition Route</b>                    |                                       |
| Oral                                      |                                       |
| NGT                                       | 2.20 (1.38, 3.53), p = 0.002          |
| <b>TBSA</b>                               |                                       |
| TBSA                                      | 1.02 (1.00, 1.04), p = 0.010          |
| <b>Age</b>                                |                                       |
| Age                                       | 1.01 (1.00, 1.01), p = 0.007          |
| <b>Sex</b>                                |                                       |
| Male                                      |                                       |
| Female                                    |                                       |

\* Backward selection was performed to create further models. Selection ceased when AIC was not improved with further elimination.  
<sup>a</sup> Multivariate Negative Binomial Regression model

**Table S4.** Patients were categorised according to diabetes status based on history of diabetes and admission HbA1c, and whether they had inpatient BSL monitoring. Numbers of patients who experienced any BSL  $\geq 11.1$  mmol/L, no BSL  $\geq 11.1$  mmol/L or who had no BSL measurement, are tabulated.

|                            | <b>Undiagnosed diabetes (no history of diabetes, admission HbA1c <math>\geq 6.5\%</math>)</b> | <b>Pre-existing diabetes (history of diabetes OR admission HbA1c <math>\geq 6.5\%</math>)</b> | <b>No diabetes (no history of diabetes and admission HbA1c <math>&lt; 6.5\%</math>)</b> |
|----------------------------|-----------------------------------------------------------------------------------------------|-----------------------------------------------------------------------------------------------|-----------------------------------------------------------------------------------------|
| Any BSL $\geq 11.1$ mmol/L | 3                                                                                             | 24                                                                                            | 8                                                                                       |
| No BSL $\geq 11.1$ mmol/L  | 0                                                                                             | 5                                                                                             | 10                                                                                      |
| No BSL measurement         | 1                                                                                             | 1                                                                                             | 99                                                                                      |
